# Supplementary material for: Expression of HK2, PKM2, and PFKM Is Associated with Metastasis and Late Disease Onset in Breast Cancer Patients
Source: MDPI journal article supplement (doi:10.3390/genes13030549), 2022-03-20
Supplement: s1 [file s1]

**A**

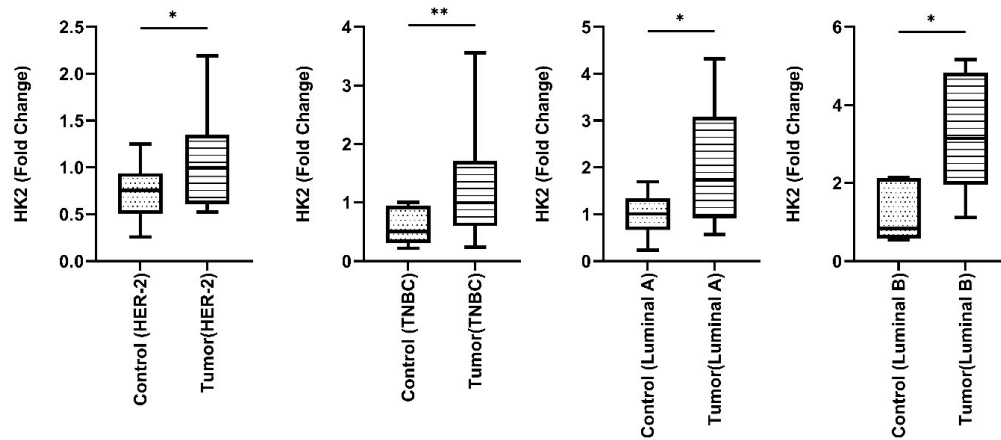

**B**

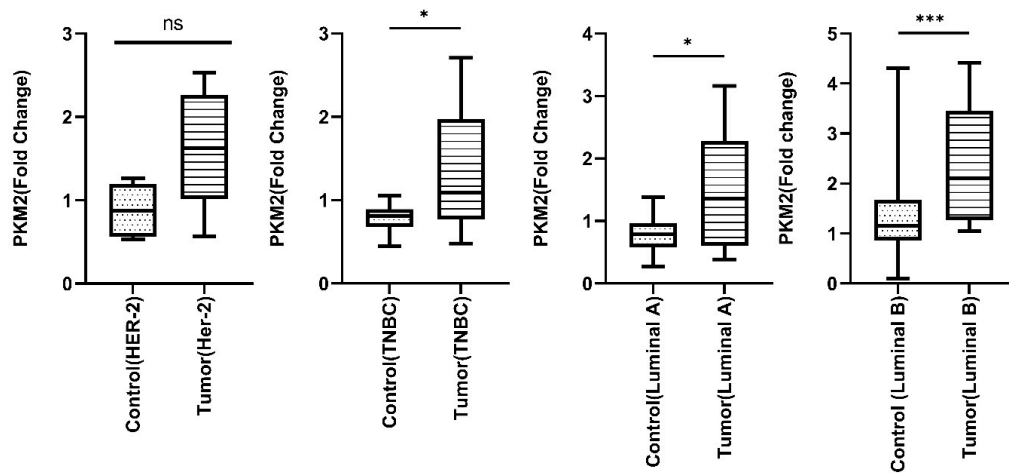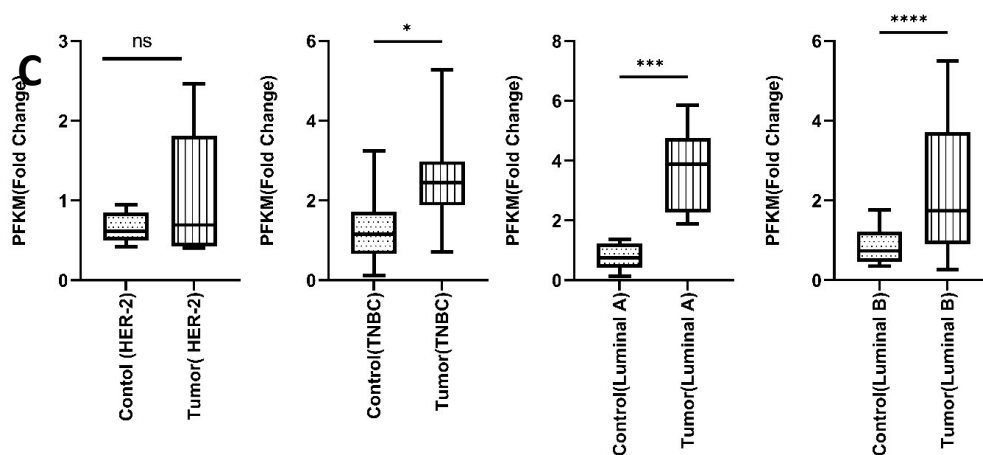

**Supplementary Figure S1:** Expression of glycolytic markers in molecular subtypes of breast cancer (tumor vs paired control). Fold change of glycolytic gene in A) *HK2*; B) *PKM2*; C) *PFKM*. Significance level \*p<0.05, \*\*p<0.001 \*\*\*p<0.0001.

**Supplementary Table S1:** Correlation of *HK2*, *PFKM* and *PKM2* gene with *Ki-67* (proliferation marker). \*Spearman correlation, all bold values are significant having  $p < 0.05$

|                | Ki-67 | Hk2          | PFKM         | PKM2         |
|----------------|-------|--------------|--------------|--------------|
| Ki-67(r-value) | 1     | <b>0.529</b> | <b>0.509</b> | <b>0.597</b> |
| p-value        |       | <0.0001      | <0.0001      | <0.0001      |

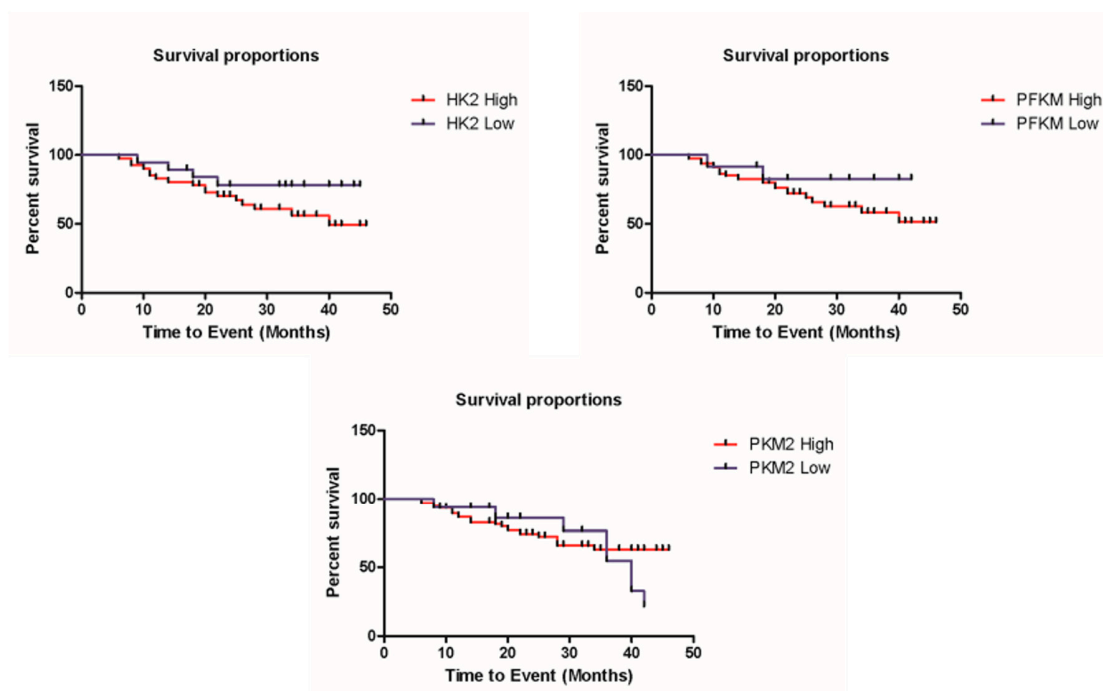

**Supplementary Figure S2:** Overall survival analysis using Log rank (Mantel-Cox) test of *HK2* (HR=1.951;  $p=0.1$ ), *PFKM* (HR=2.03;  $p=0.1$ ) and *PKM2* (HR=0.6;  $p=0.4$ ) genes in breast cancer cohort.
